# Supplementary material for: Collaborative Cross mice and their power to map host susceptibility toAspergillus fumigatusinfection
Source: HighWire-hosted journal article supplement (doi:10.1101/gr.118786.110), 2011-04-14
Supplement: SupplTableS3.pdf [file SupplTableS3.pdf]

Table S3. Details of the genes under each QTL with significant merge SNPs nearby.

| SNPs with good SDP                                               | in/near gene (location of gene)                                                                                                                                                                                                                                                        |
|------------------------------------------------------------------|----------------------------------------------------------------------------------------------------------------------------------------------------------------------------------------------------------------------------------------------------------------------------------------|
| <b>Asprl 1: Chr 8</b>                                            |                                                                                                                                                                                                                                                                                        |
| 47,951,844 (logP = 5.63)                                         | near <b>Irf2</b> (47,825,115-47,932,801)                                                                                                                                                                                                                                               |
| run (logP = 5.78) between 48,281,756 and 48,287,513              | in Stox2 (48,271,310 – 48,437,702)                                                                                                                                                                                                                                                     |
| run (logP = 5.96) between 48,872,956 and 48,896,293              | near Cldn22 (48,909,836-48,910,829) and Wwc2 (48,911,437-49,075,897)                                                                                                                                                                                                                   |
| <b>Asprl 2: Chr 10 B</b>                                         |                                                                                                                                                                                                                                                                                        |
| Nothing                                                          |                                                                                                                                                                                                                                                                                        |
| <b>Asprl 3: Chr 15</b>                                           |                                                                                                                                                                                                                                                                                        |
| Runs of SNPs follow the peak                                     |                                                                                                                                                                                                                                                                                        |
| highest logP run (logP = 6.18) between 34,107,007 and 34,425,409 | over multiple genes:<br><b>Laptm4b</b> (34,167,781-34,214,050)<br>Matn2 (34,236,436-34,365,997)<br>9430069I07Rik (34,278,808-34,287,627)<br>Rp130 (34,370,260-34,373,395)<br>BC030476 (34,383,067-34,403,646)<br><b>Hrsp12</b> (34,413,776-34,424,935)<br>Pop1 (34,425,087-34,460,402) |
| <b>Asprl 4: Chr 10 A</b>                                         |                                                                                                                                                                                                                                                                                        |
| 13,565,620 (logP = 5.68)                                         | in Aig1 (13,366,863-13,588,786)                                                                                                                                                                                                                                                        |
| run (logP = 6.82, 7.16) between 14,753,652 and 14,944,601        | near Nmbr (14,480,027-14,490,389)                                                                                                                                                                                                                                                      |
| run (logP = 6.97) between 15,548,942 and 15,714,476              | not really near anything                                                                                                                                                                                                                                                               |
| 22,235,197 (logP = 6.78) and 22,241,040 (logP = 6.78)            | near Raet1d (22,081,700-22,093,943) and Slc2a12 (22,364,937-22,424,091)                                                                                                                                                                                                                |
| 22,532,385 (logP = 6.92)                                         | near ENSMUSG00000075292                                                                                                                                                                                                                                                                |

|                                |                                    |
|--------------------------------|------------------------------------|
|                                | (22,535,555-22,543,136) and        |
|                                | Tcf21 (22,537,085-22,539,980)      |
|                                |                                    |
| 22,537,465 (logP = 6.92)       | in ENSMUSG00000075292 and Tcf21    |
|                                |                                    |
| 22,969,475 (logP = 6.53)       | in Eya4 (22,823,974-23,069,701)    |
| and 22,973,889 (logP = 6.53)   |                                    |
| and 23,009,306 (logP = 6.53)   |                                    |
|                                |                                    |
| 23,156,428 (logP = 6.29)       | near Eya4                          |
|                                |                                    |
| <b>Aspr1 5: Chr 18</b>         |                                    |
|                                |                                    |
| 11,064,012 (logP = 5.34)       | in Gata6 (11,052,508-11,085,633)   |
|                                |                                    |
| 11,391,085 (logP = 5.30)       | not really near anything           |
|                                |                                    |
| 11,755,222 (logP = 5.19)       | near Rbbp8 (11,815,936-11,901,716) |
| and 11,914,962 (logP = 5.19)   |                                    |
|                                |                                    |
| <b>Aspr1 6: Chr 3</b>          |                                    |
|                                |                                    |
| Run (logP = 5.03) between      | over Frs1                          |
| 116,544,990 and 116,605,934    | (116,581,145-116,606,668)          |
|                                |                                    |
| 116,459,656 (logP = 5.03)      | in Agl (116,442,917-116,511,084)   |
| and 116,460,296 (logP = 5.03)  |                                    |
| and 116,494,696 (logP = 4.84)  |                                    |
|                                |                                    |
| <b>Aspr1 7: Chr2</b>           |                                    |
|                                |                                    |
| Runs of SNPs follow the peak   |                                    |
|                                |                                    |
| Highest logP run (logP = 4.50) | over multiple genes:               |
| between                        |                                    |
| 9,961,897 and 10,263,166       | Itih5 (10,075,170-10,178,153)      |
|                                | Itih2 (10,016,218-10,052,290)      |
|                                | Kin (10,002,236-10,014,327)        |
|                                | Atp5c1 (9,977,643-10,002,137)      |
|                                | Taf3 (9,836,181-9,970,243)         |
